# Supplementary material
Source: publisher figshare collection journal article supplement (https://karger.figshare.com/articles/dataset/_/5124586)
Supplement: Supplementary file 1 [file 1]

## Supplemental Figure 1

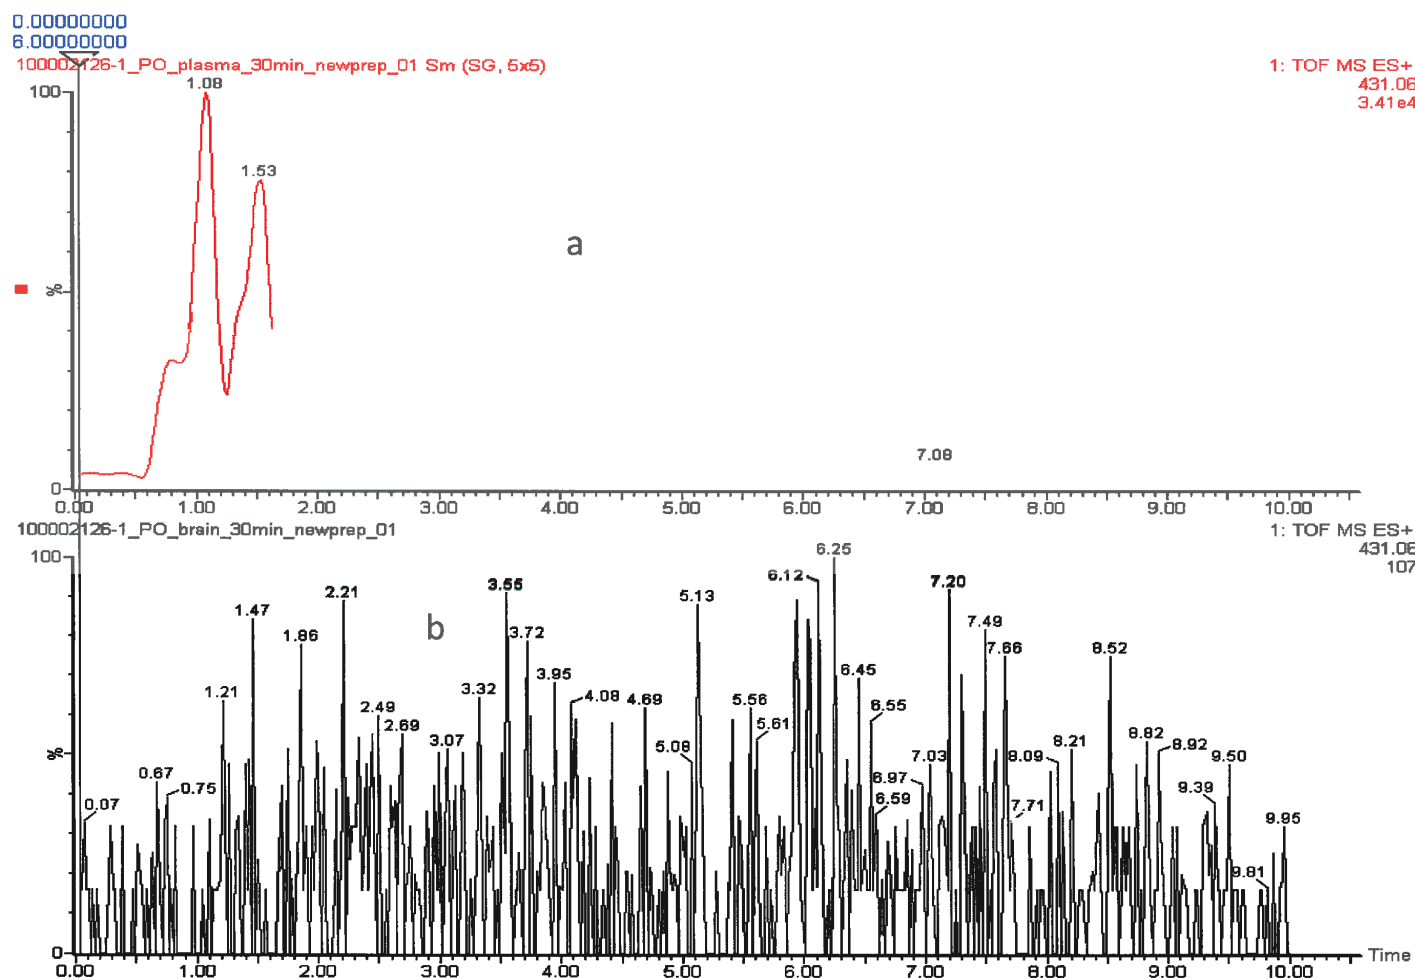

Supplemental Figure 1. 7,8-DHF is glucuronidated in mouse plasma.

Two months old male CD1 mice were P.O. dosed with 50 mg/kg of 7,8-DHF. In 30 min, the plasma was precipitated with acetonitrile and analyzed by LC/MS/MS. The extracted ion chromatogram at 431 m/z from full-scan analysis of a 30 min plasma samples and brain samples after P.O. dosing of 7,8-DHF.
