# Supplementary material
Source: publisher figshare collection journal article supplement (https://karger.figshare.com/articles/dataset/_/5124586)
Supplement: Supplementary file 2 [file 1]

Supplemental Figure 2

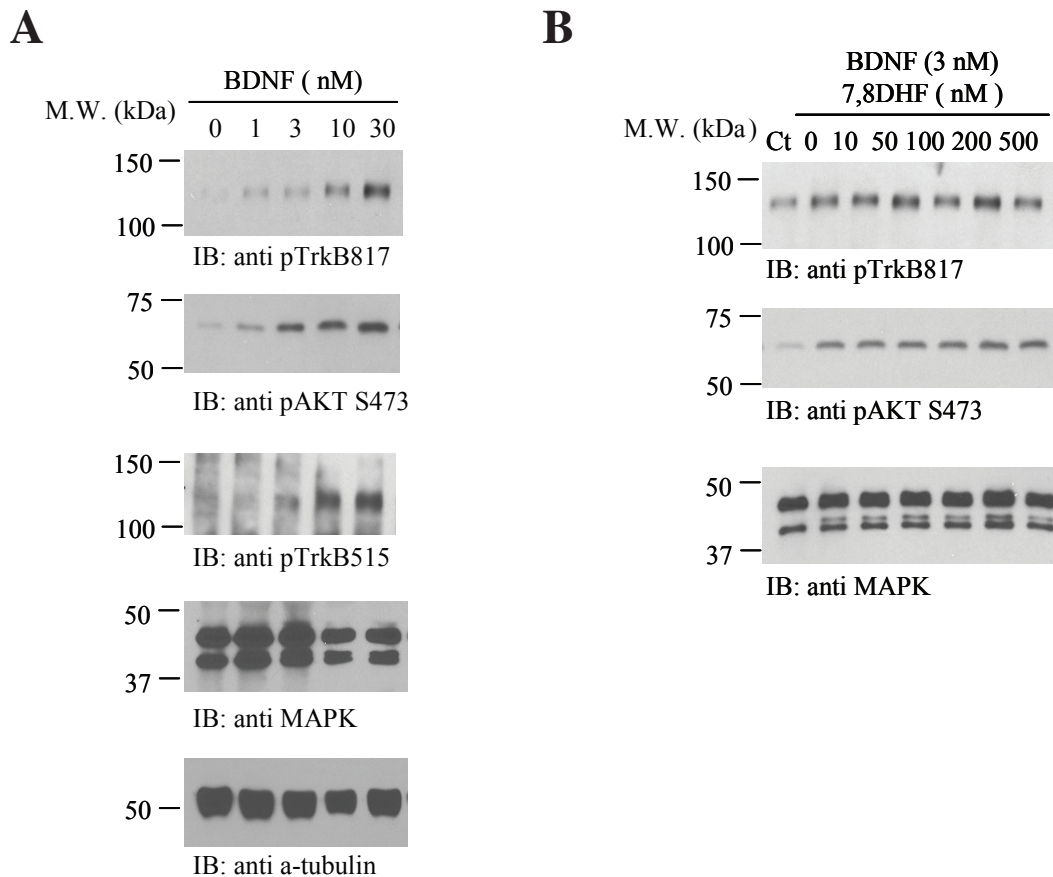

Supplemental Figure 2. 7,8-DHF synergistically elevates TrkB activation by BDNF.

A. BDNF activate TrkB in a dose dependent manner. Primary cultures of cortical neurons (DIV7) were treated with different doses of BDNF 15 min, and TrkB phosphorylation was monitored by anti-p-TrkB 817 and p-TrkB 515 (top and 3<sup>rd</sup> panels). P-Akt and was also activated (2<sup>nd</sup> panel). MAPK and a-Tubulin were employed as lading control (4<sup>th</sup> and bottom panels). B. Primary neurons were treated with BDNF (3 nM) in the presence of various doses of 7,8-DHF for 15 min. The neuronal lysates were analyzed by immunoblotting with anti-p-TrkB 817 and p-Akt antibodies. MAPK was monitored as loading control (bottom panel).
